# Supplementary material
Source: publisher figshare collection journal article supplement (https://acs.figshare.com/ndownloader/files/30455446)
Supplement: Supplementary file 1 [file 30455446]

## ***Supporting Information***

# **Ag-In-Zn-S quantum dots dominated interface kinetics in Ag-In-Zn-S/NiFe LDH composite towards efficient photo-assisted electrocatalytic water splitting**

Dongxu Zhang<sup>1§</sup>, Weixuan Dong<sup>1§</sup>, Yanhong Liu<sup>1§</sup>, Xiaoqing Gu<sup>3</sup>, Tianyu Yang<sup>3</sup>, Qiang Hong<sup>3</sup>, Di Li<sup>1</sup>, Dongqi Zhang<sup>1</sup>, Hongbo Zhou<sup>1</sup>, Hui Huang<sup>3</sup>, Baodong Mao<sup>1,\*</sup>, Zhenhui Kang<sup>2,3\*</sup> and Weidong Shi<sup>1,\*</sup>

*<sup>1</sup>School of Chemistry and Chemical Engineering, Jiangsu University, 301 Xuefu Road, Zhenjiang 212013, China*

*<sup>2</sup>Macao Institute of Materials Science and Engineering, Macau University of Science and Technology, Taipa 999078, Macau SAR, China*

*<sup>3</sup>Institute of Functional Nano and Soft Materials (FUNSOM), Jiangsu Key Laboratory for Carbon-based Functional Materials and Devices, Soochow University, 199 Ren'ai Road, Suzhou 215123, China*

*\*Corresponding authors E-mail: maobd@ujs.edu.cn (B.M.); zhkang@suda.edu.cn (Z.K.); swd1978@ujs.edu.cn (W.S.)*

Contents:

Total number of pages: 16

Total number of Figures: 14

Total number of Tables: 1

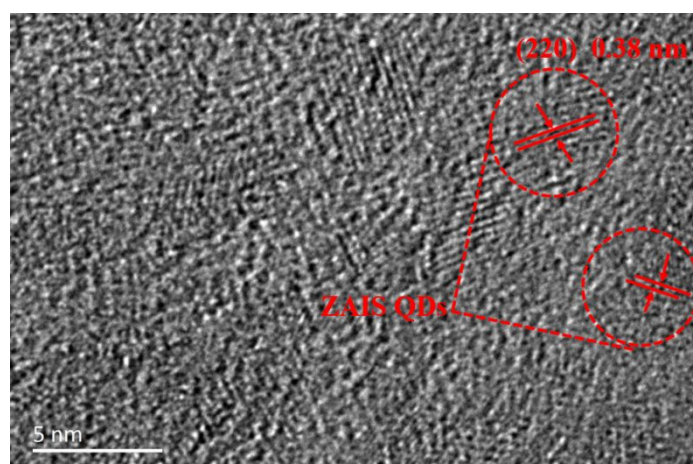

**Figure S1.** HRTEM image of the ZAIS QDs.

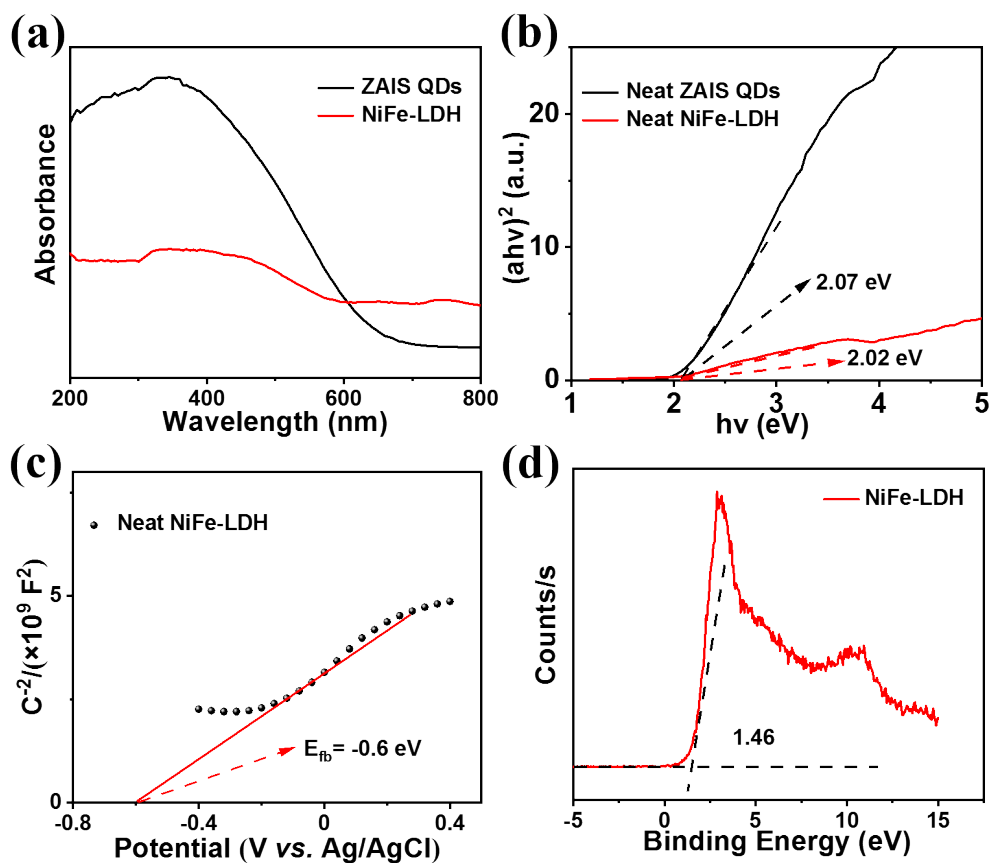

**Figure S2.** (a) UV-vis diffuse reflectance spectra for ZAIS QDs and NiFe LDH, (b) corresponding Tauc plot of  $(\alpha h\nu)^2$  vs  $h\nu$  for bandgap estimation. (c) Mott-Schottky (M-S) plots for NiFe LDH and (d) XPS valence band spectrum for NiFe LDH.

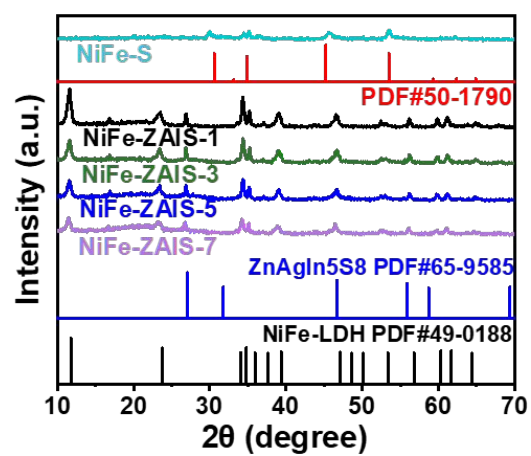

**Figure S3.** XRD patterns of NiFe-S, NiFe-ZAIS-1, NiFe-ZAIS-3, NiFe-ZAIS-5 and NiFe-ZAIS-7.

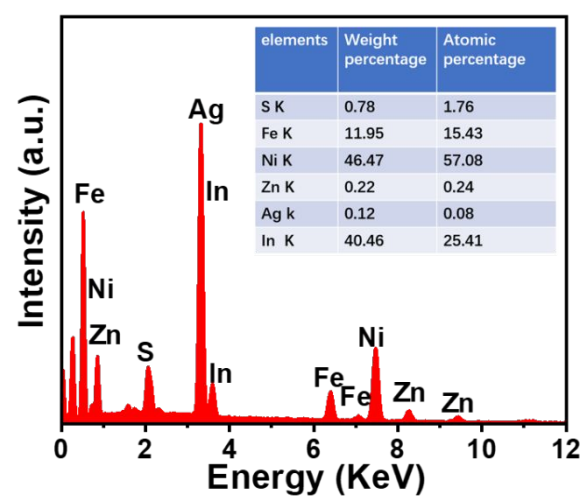

**Figure S4.** EDX of NF@NiFe-ZAIS-5.

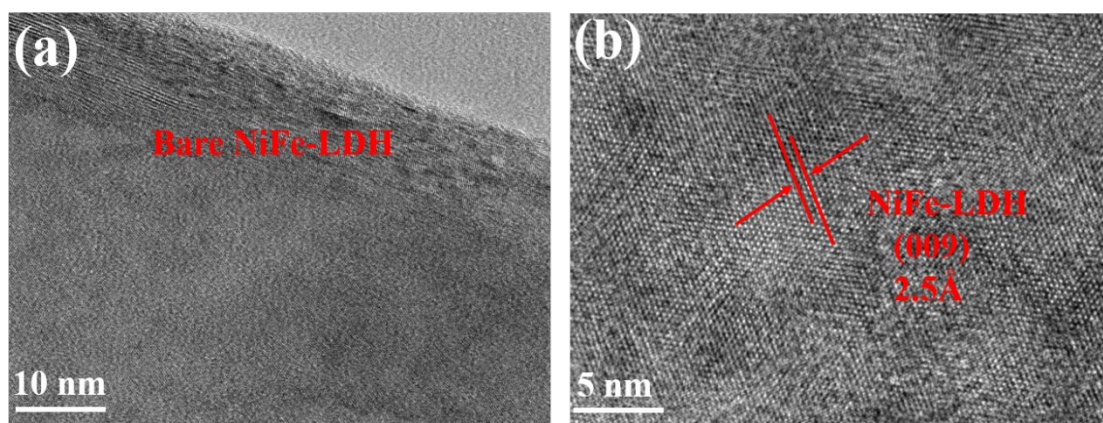

**Figure S5.** TEM (a) and HRTEM (b) images of NiFe LDH nanosheets.

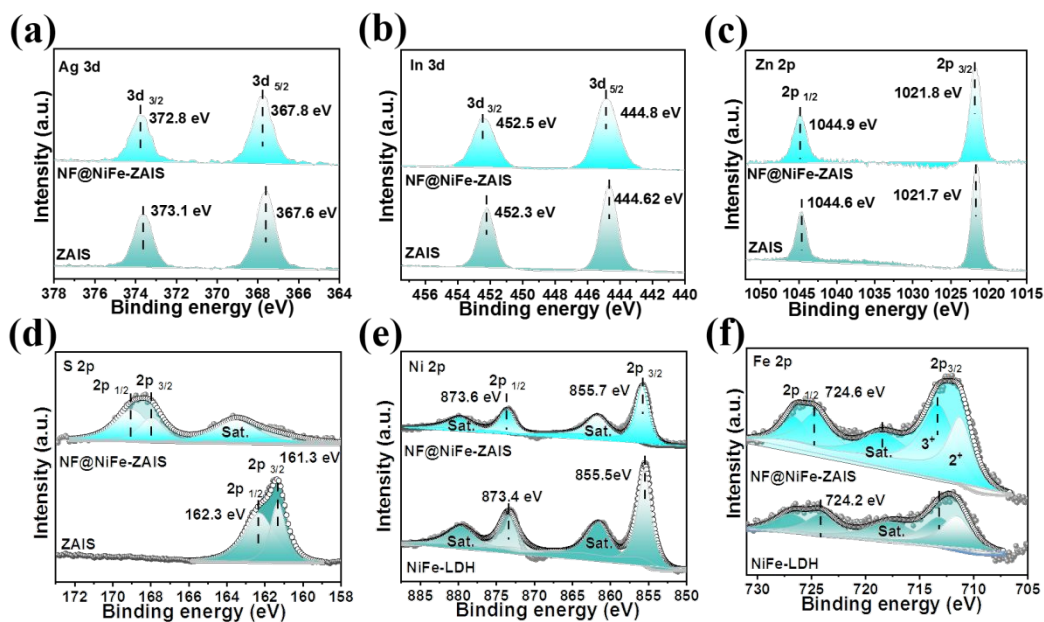

**Figure S6.** High-resolution XPS spectra of (a) Ag 3d, (b) In 3d, (c) Zn 2p, and (d) S 2p of ZAIS QDs and NiFe-ZAIS. (e) Ni 2p and (f) Fe 2p XPS spectra of NiFe LDH and NiFe-ZAIS.

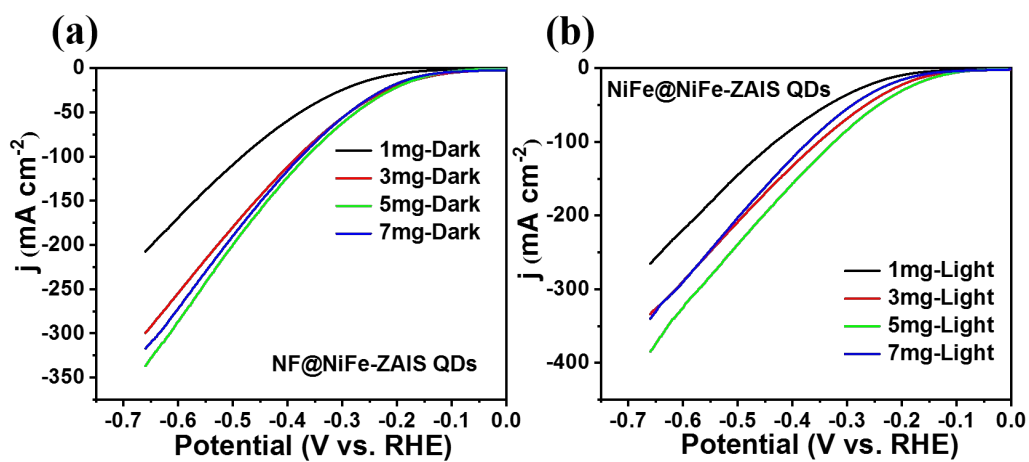

**Figure S7.** HER polarization curves of NF@NiFe-ZAIS with different amount of ZAIS QDs (1, 3, 5, and 7 mg) without (a) or with (b) illumination by Xe light under electrochemical test.



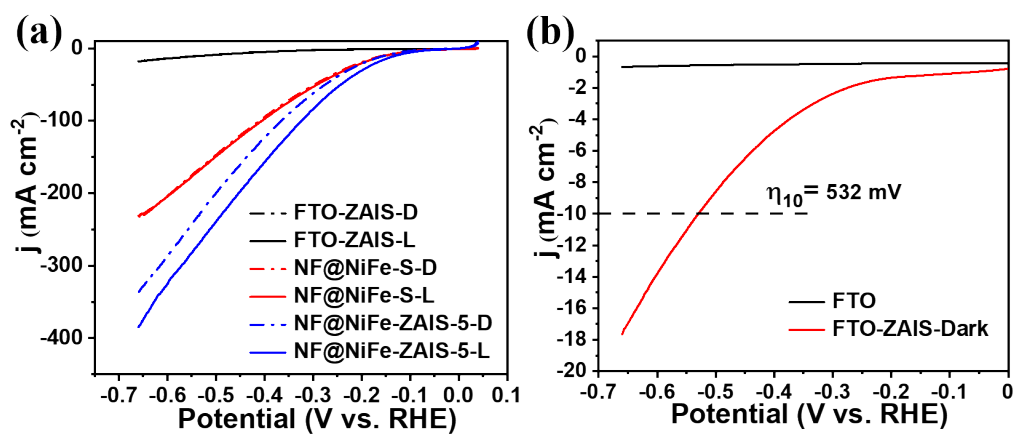

**Figure S8.** (a) HER polarization curves of FTO-ZAIS-D, FTO-ZAIS-L, NF@NiFe-S-D, NF@NiFe-S-L, NF@NiFe-ZAIS-5-D, and NF@NiFe-ZAIS-5-L in 1M KOH. (b) HER polarization curves of FTO and FTO-ZAIS-Dark in 1M KOH.

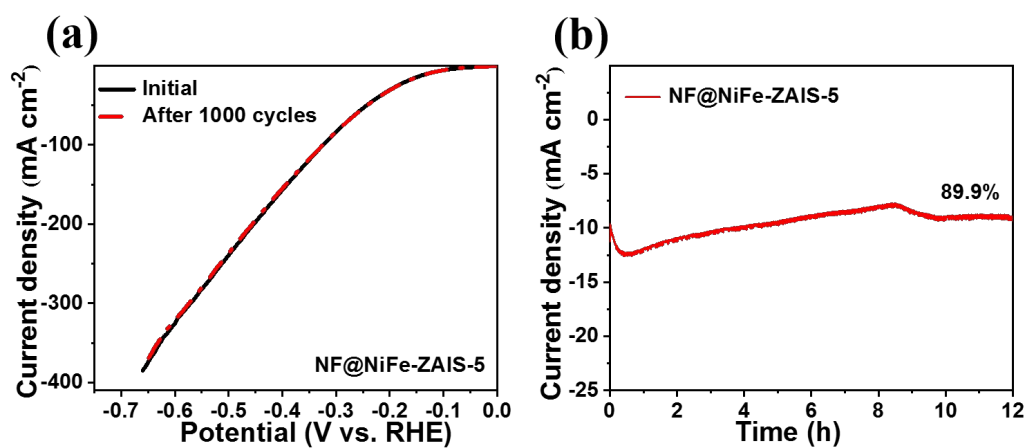

**Figure S9.** (a) Polarization curves of NF@NiFe-ZAIS-5 for the stability test after 1000 CV cycles.

(b) The long-term i-t curves of NF@NiFe-ZAIS-5 for the HER durability test at 10 mA cm<sup>-2</sup>.

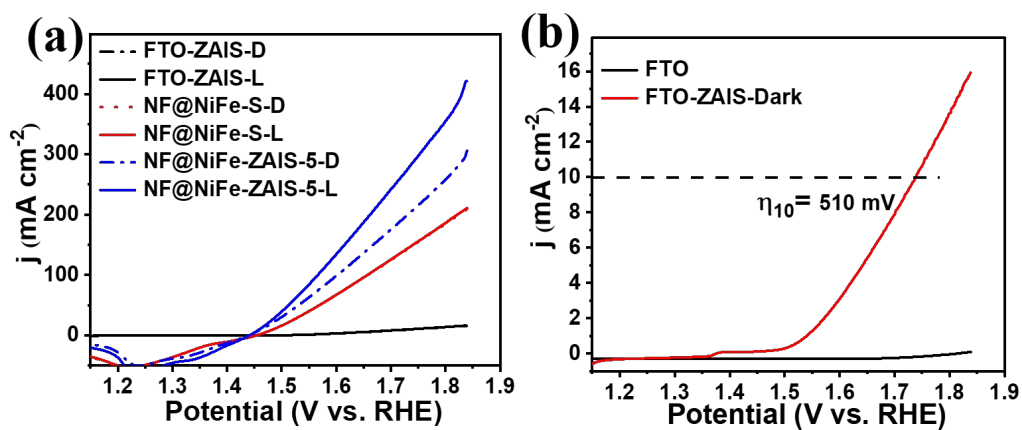

**Figure S10.** (a) OER polarization curves of FTO-ZAIS-D, FTO-ZAIS-L, NF@NiFe-S-D, NF@NiFe-S-L, NF@NiFe-ZAIS-5-D, and NF@NiFe-ZAIS-5-L in 1M KOH. (b) OER polarization curves of FTO and FTO-ZAIS-Dark in 1M KOH.

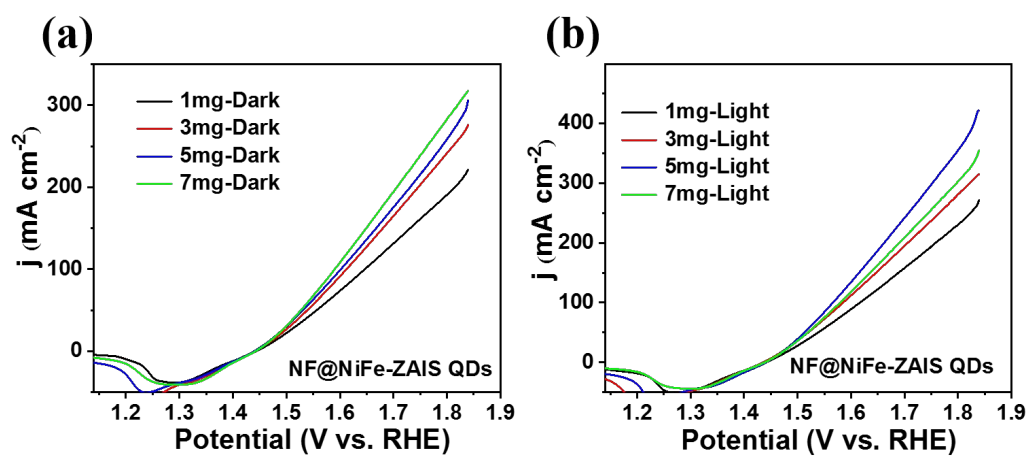

**Figure S11.** OER polarization curves of NF@NiFe-ZAIS with different amount of ZAIS QDs (1, 3, 5, and 7 mg) without (a) or with (b) illumination by Xe light under electrochemical test.

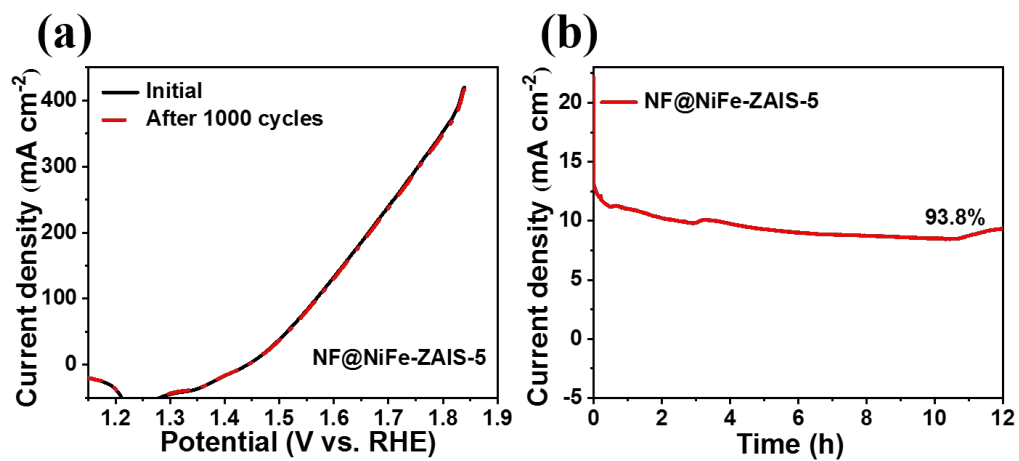

**Figure S12.** (a) Polarization curves of NF@NiFe-ZAIS-5 for the stability test after 1000 CV cycles. (b) The i-t curves of NF@NiFe-ZAIS-5 for OER durability test at 10 mA cm<sup>-2</sup>.

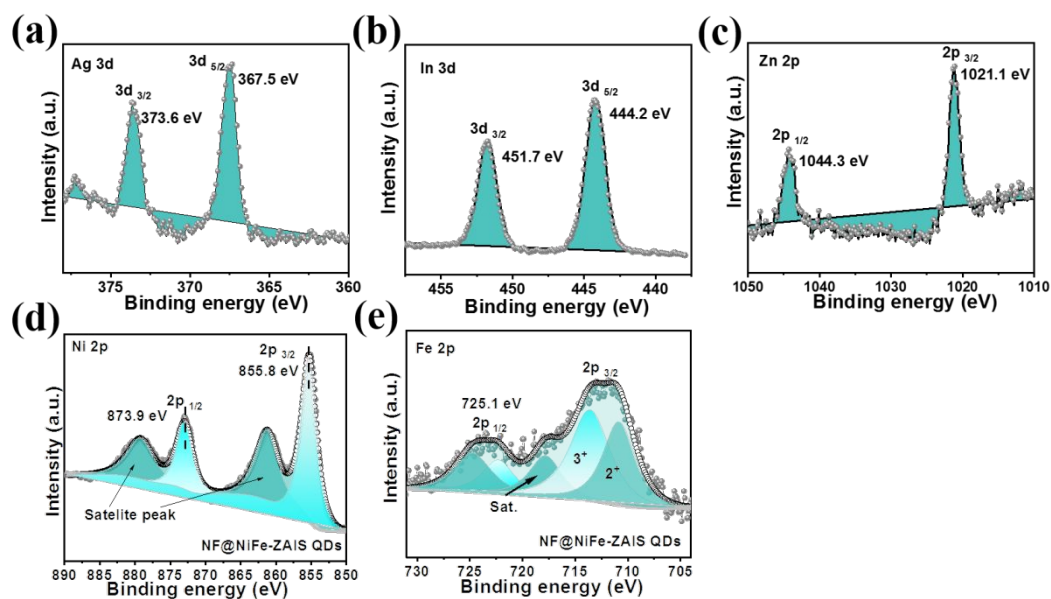

**Figure S13.** High-resolution XPS spectra of (a) Ag 3d, (b) In 3d, (c) Zn 2p, (d) Ni 2p and (e) Fe 2p for NF@NiFe-ZAIS QDs after P-EC stability test with light irradiation for 12 h.

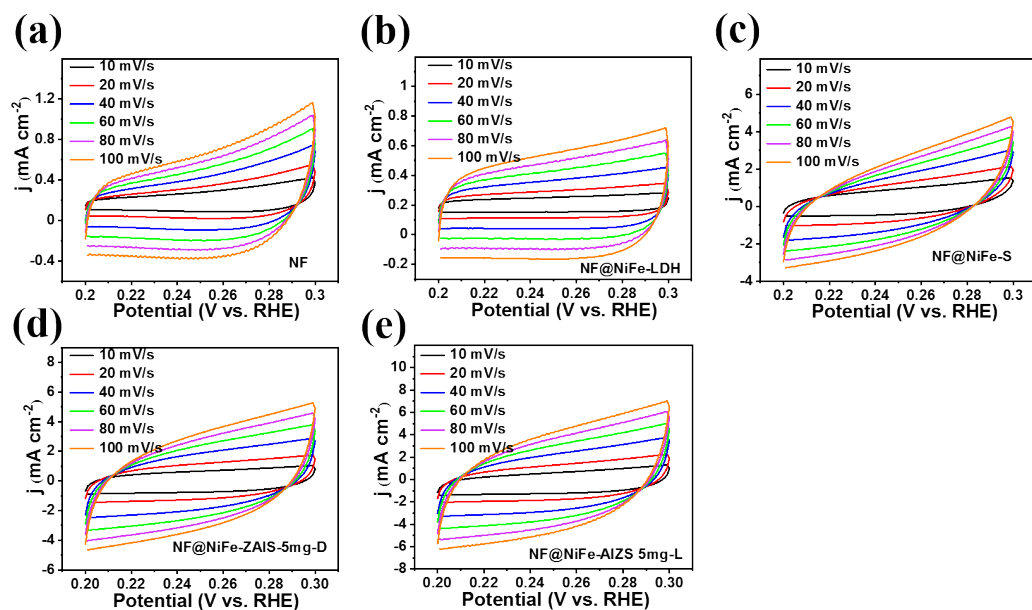

**Figure S14.** Cyclic voltammogram curves at different scan rates (from 10 mV/s to 100 mV/s) of (a) NF, (b) NF@NiFe-LDH, (c) NF@NiFe-S, (d) NF@NiFe-ZAIS-5mg-D, and (e) NF@NiFe-ZAIS-5mg-D.

**Table S1.** Corresponding fitting parameters of EIS data using the equivalent circuit in the inset in Figure 9d.

| Samples          | $R_s$ ( $\Omega$ cm <sup>2</sup> ) | $R_{ct}$ ( $\Omega$ cm <sup>2</sup> ) |
|------------------|------------------------------------|---------------------------------------|
| NF               | 10.59                              | 11.24                                 |
| NF@NiFe-LDH      | 4.28                               | 5.24                                  |
| NF@NiFe-S        | 4.91                               | 3.20                                  |
| NF@NiFe-ZAIS-5-D | 3.13                               | 2.57                                  |
| NF@NiFe-ZAIS-5-L | 6.98                               | 1.18                                  |
